# Supplementary material for: Efficient hybrid solar cells using PbSxSe1−x quantum dots and nanorods for broad-range photon absorption and well-assembled charge transfer networks
Source: Royal Society of Chemistry journal article supplement (doi:10.1039/c3nr01923c), 2013-01-01
Supplement: c3nr01923c.pdf [file c3nr01923c.pdf]

**Supplementary Information for:**

**Efficient hybrid solar cells using  $\text{PbS}_x\text{Se}_{1-x}$  quantum dots and nanorods for broad-range photon absorption and well-assembled charge transfer networks**

Minwoo Nam<sup>a,§</sup>, Sungwoo Kim<sup>b,§</sup>, Sejin Kim<sup>b</sup>, Sang-Wook Kim<sup>\*b</sup> and Keekeun Lee<sup>\*a</sup>

<sup>a</sup> Department of Electrical and Computer Engineering, Ajou University, Woncheon-dong, Yeongtong-gu, Suwon 443-749, Republic of Korea

<sup>b</sup> Department of Molecular Science and Technology, Ajou University, Woncheon-dong, Yeongtong-gu, Suwon 443-749, Republic of Korea

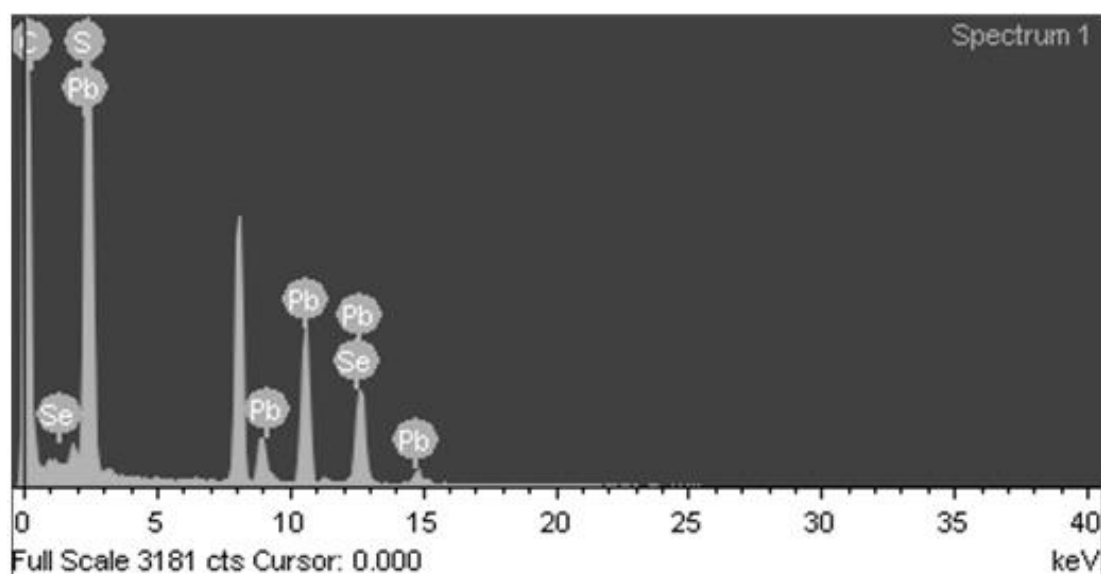

Figure S1. EDS analysis of the blend with PSBTBT and inorganic  $\text{PbS}_{0.7}\text{Se}_{0.3}$  semiconductor (C for PSBTBT; Pb, S, and Se for  $\text{PbS}_{0.7}\text{Se}_{0.3}$ ). Se peaks are not clearly discernible, presumably due to their overlap with S peaks.

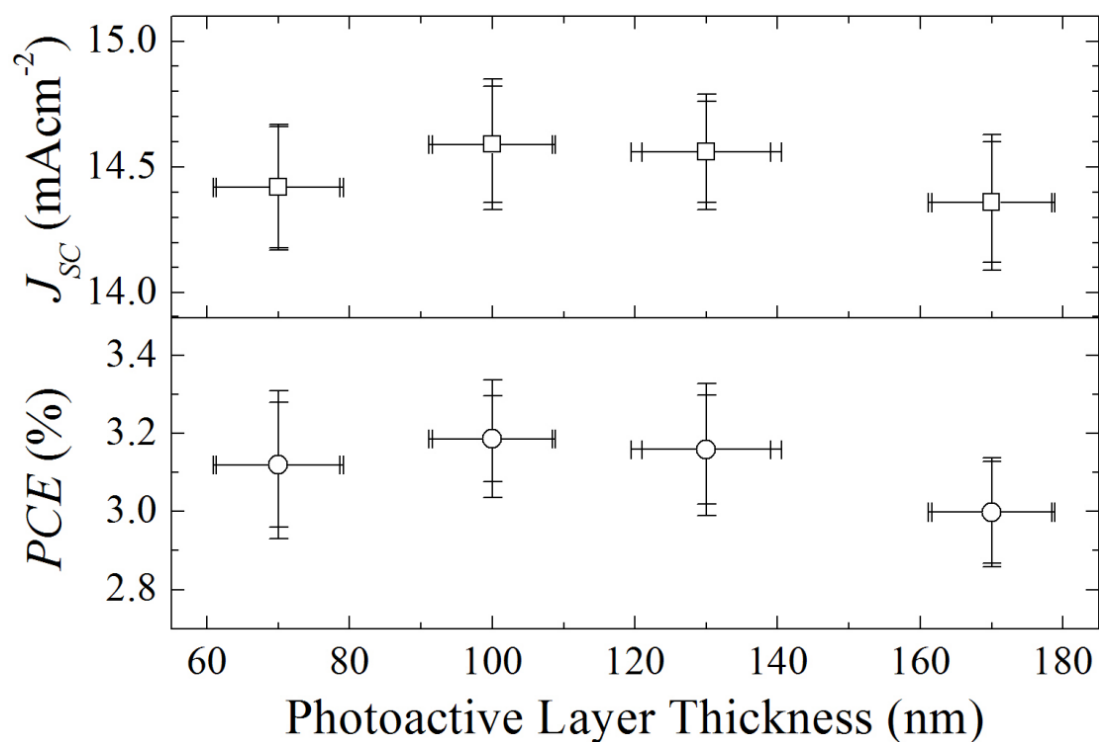

Figure S2.  $J_{sc}$  and  $PCE$  of the optimal hetero-structured devices as a function of the photoactive layer thickness. The hybrid blend consists of PSBTBT and PbS<sub>0.7</sub>S<sub>0.3</sub> QDs and NRs (0.3:0.7). The 90–110 nm-thick films exhibit better  $J_{sc}$  and hence  $PCE$ . The standard deviations were taken from more than 10 devices.

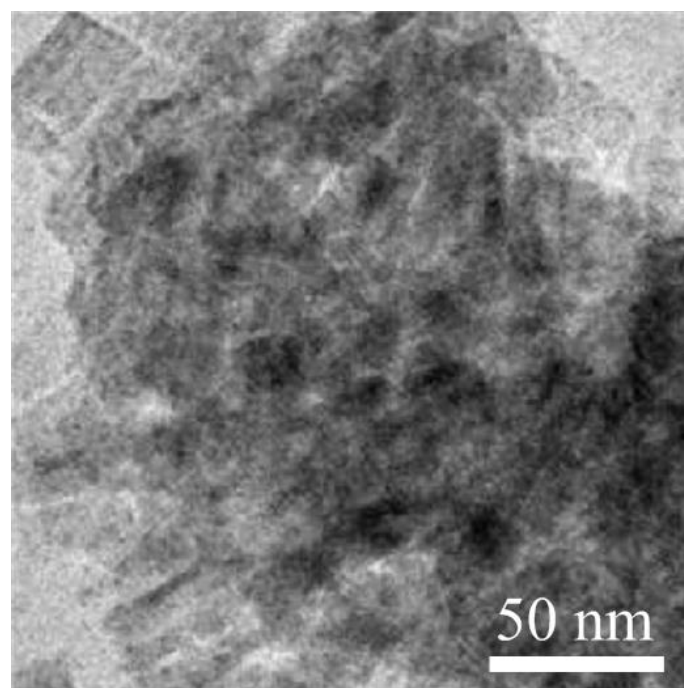

Figure S3. Plane TEM image of the polymer:NRs blend. The NR lattice is difficult to discern owing to the agglomeration between NRs. This can lead to unintentional performance degradation in the hybrid device.

Table S1. Summary of the fluorescence lifetime data extracted from three PL decay measurements

|                            | $\tau$ (ns) | Test #1 | Test #2 | Test #3 |
|----------------------------|-------------|---------|---------|---------|
| PSBTBT:QDs only            | $\tau_1$    | 0.245   | 0.168   | 0.272   |
|                            | $\tau_2$    | 3.920   | 6.312   | 3.915   |
| PSBTBT:NRs only            | $\tau_1$    | 0.163   | 0.113   | 0.193   |
|                            | $\tau_2$    | 3.137   | 6.150   | 3.078   |
| PSBTBT:QDs & NRs (0.3:0.7) | $\tau_1$    | 0.072   | 0.056   | 0.134   |
|                            | $\tau_2$    | 2.234   | 3.971   | 2.009   |
